# Supplementary material
Source: PubMed Central journal article supplement (PMC5743237)
Supplement: ct6b00931_si_001.pdf [file ct6b00931_si_001.pdf]

## Supporting Information

for “Gaussian Accelerated Molecular Dynamics in NAMD” by Yui Tik Pang, Yinglong Miao, Yi Wang and J. Andrew McCammon.

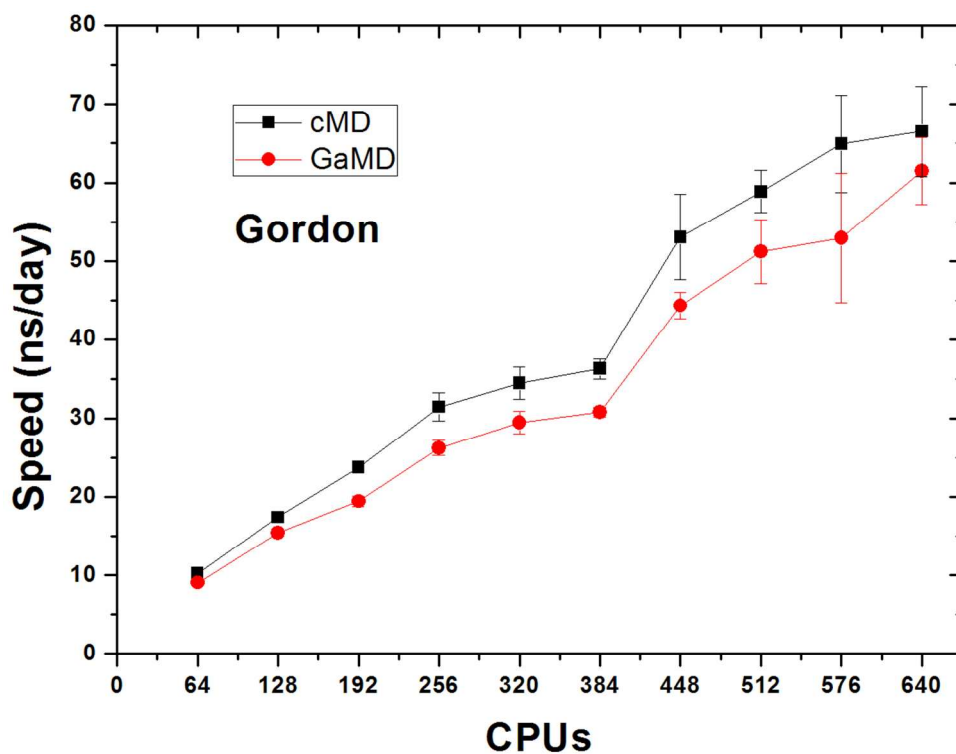

**Fig. S1** Scaling performance of the conventional MD (cMD) and Gaussian accelerated molecular dynamics (GaMD) simulations using NAMD 2.11 on the M3 muscarinic G-protein-coupled receptor system (~55,500 atoms in total). The error bars were obtained as the standard deviation of six benchmarking numbers output in the NAMD 2.11 log file.

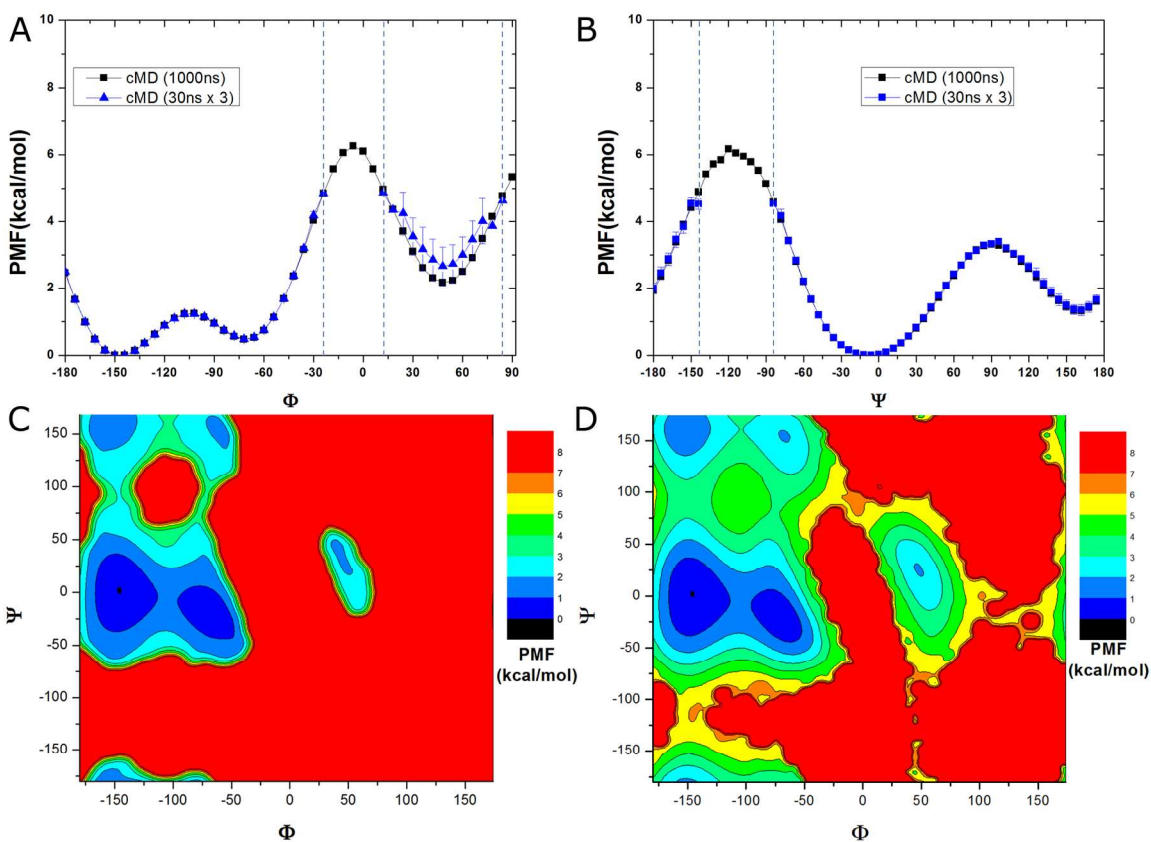

**Fig. S2** Conventional MD (cMD) simulations of the alanine dipeptide: (A-B) 1D PMF profiles of (A)  $\Phi$  and (B)  $\Psi$  obtained from three independent 30ns cMD simulations that hardly sample the high energy barriers and (C-D) 2D PMF profiles of ( $\Phi$ ,  $\Psi$ ) obtained from the (C) three 30ns cMD simulations combined and (D) a converged 1000ns cMD simulation.

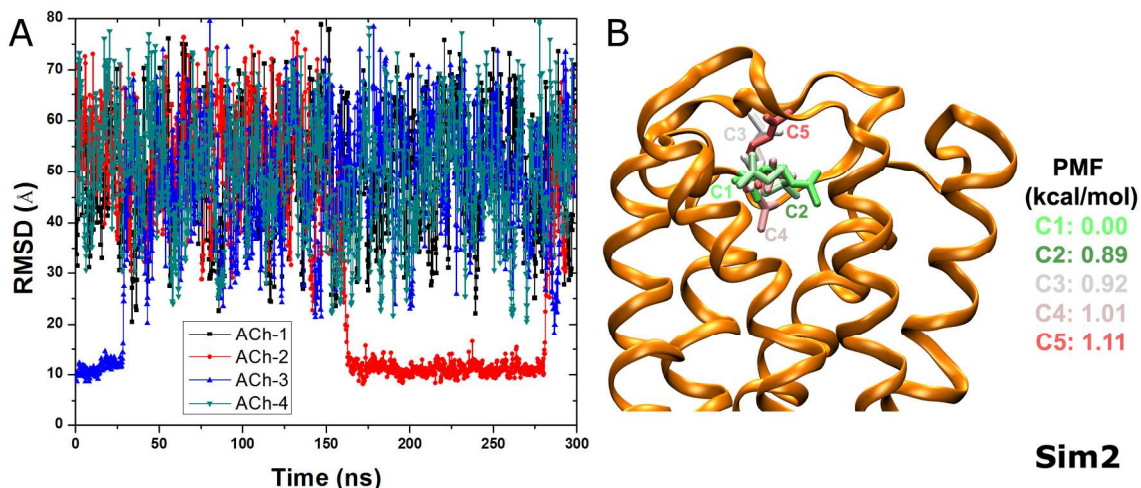

**Fig. S3** The second copy of GaMD simulation of the acetylcholine (ACh) endogenous agonist binding to the M3 muscarinic GPCR: (A) the RMSD of the four diffusing ACh molecules relative to the Glide docking pose, which depicts ACh-2 and ACh-3 binds briefly to the extracellular vestibule with  $\sim 10$  Å RMSD and (B) the five lowest energy structural clusters of ACh that are labeled and colored in a GWR scale according to free energy values obtained from reweighting of the GaMD simulations.

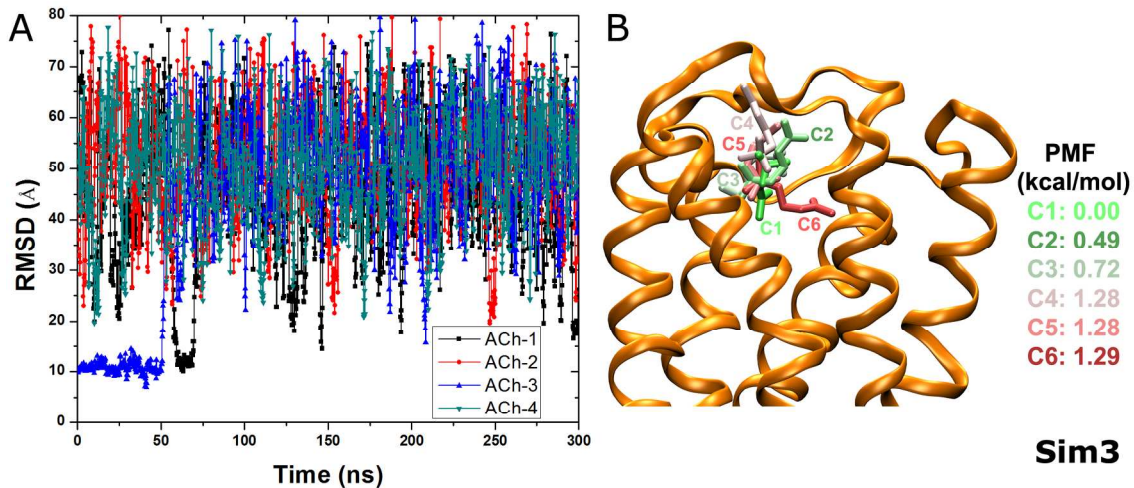

**Fig. S4** The third copy of GaMD simulation of the acetylcholine (ACh) endogenous agonist binding to the M3 muscarinic GPCR: (A) the RMSD of the four diffusing ACh molecules relative to the Glide docking pose, which depicts ACh-1 and ACh-3 binds briefly to the extracellular vestibule with  $\sim 10$  Å RMSD and (B) the five lowest energy structural clusters of ACh that are labeled and colored in a GWR scale according to free energy values obtained from reweighting of the GaMD simulations.
